# Supplementary material for: PPSW–SHAP: Towards Interpretable Cell Classification Using Tree-Based SHAP Image Decomposition and Restoration for High-Throughput Bright-Field Imaging
Source: MDPI journal article supplement (doi:10.3390/cells12101384), 2023-05-13
Supplement: s1 [file s1]

## Supplementary Tables

**Table S1.** Performance metrics of Random Forest classifiers for cell density spectra using discrete second-level mother wavelet functions.

| <i>Method</i>            | <i>Variables</i> | <i>Percentage Split</i> |                  |               |                 |
|--------------------------|------------------|-------------------------|------------------|---------------|-----------------|
|                          |                  | <i>Accuracy</i>         | <i>Precision</i> | <i>Recall</i> | <i>F1-score</i> |
| <i>DFT modulus, PPSW</i> | <i>bior1.1</i>   | 91.836                  | 91.774           | 91.766        | 91.760          |
|                          | <i>bior2.4</i>   | 91.523                  | 91.480           | 91.452        | 91.456          |
|                          | <i>bior6.8</i>   | 91.089                  | 90.935           | 90.944        | 90.935          |
|                          | <i>coif1</i>     | 91.089                  | 91.013           | 90.975        | 90.992          |
|                          | <i>coif2</i>     | 91.245                  | 91.154           | 91.157        | 91.153          |
|                          | <i>coif5</i>     | 88.813                  | 88.654           | 88.634        | 88.616          |
|                          | <i>db2</i>       | 91.141                  | 91.195           | 91.025        | 91.103          |
|                          | <i>db10</i>      | 89.561                  | 89.437           | 89.445        | 89.439          |
|                          | <i>sym2</i>      | 91.141                  | 91.195           | 91.025        | 91.103          |
|                          | <i>sym8</i>      | 89.873                  | 89.723           | 89.737        | 89.720          |

**Table S2.** Performance metrics of Random Forest classifiers for cell media environment spectra using discrete second-level mother wavelet functions.

| <i>Method</i>            | <i>Variables</i> | <i>Percentage Split</i> |                  |               |                 |
|--------------------------|------------------|-------------------------|------------------|---------------|-----------------|
|                          |                  | <i>Accuracy</i>         | <i>Precision</i> | <i>Recall</i> | <i>F1-score</i> |
| <i>DFT modulus, PPSW</i> | <i>bior1.1</i>   | 88.171                  | 88.193           | 88.137        | 88.162          |
|                          | <i>bior2.4</i>   | 87.528                  | 87.574           | 87.456        | 87.506          |
|                          | <i>bior6.8</i>   | 86.121                  | 86.091           | 86.175        | 86.128          |
|                          | <i>coif1</i>     | 87.146                  | 87.203           | 87.105        | 87.144          |
|                          | <i>coif2</i>     | 87.372                  | 87.373           | 87.296        | 87.325          |
|                          | <i>coif5</i>     | 85.305                  | 85.292           | 85.288        | 85.290          |
|                          | <i>db2</i>       | 87.827                  | 87.997           | 87.878        | 87.929          |
|                          | <i>db10</i>      | 85.409                  | 85.403           | 85.353        | 85.376          |
|                          | <i>sym2</i>      | 87.928                  | 87.997           | 87.878        | 87.929          |
|                          | <i>sym8</i>      | 86.694                  | 86.664           | 86.667        | 86.663          |

**Table S3.** Performance metrics of various state-of-the-art tree-based machine learning models for classifying cell density spectra, utilizing high-throughput bright-field images (our baseline scenario) as well as images with image decomposition and/or restoration techniques in the Gradient Density dataset.

| <i>Variables</i>                         | <i>Model</i>  | <i>Percentage Split</i> |                  |               |                 |
|------------------------------------------|---------------|-------------------------|------------------|---------------|-----------------|
|                                          |               | <i>Accuracy</i>         | <i>Precision</i> | <i>Recall</i> | <i>F1-score</i> |
| <i>Original, u</i><br><b>Baseline</b>    | AdaBoost      | 68.074                  | 67.270           | 67.823        | 67.490          |
|                                          | GBDT          | 68.838                  | 67.704           | 68.499        | 67.926          |
|                                          | LightGBM      | 73.945                  | 73.155           | 73.770        | 73.928          |
|                                          | HistGBDT      | 74.622                  | 74.016           | 74.511        | 74.171          |
|                                          | Decision Tree | 74.587                  | 74.531           | 74.603        | 74.561          |
|                                          | XGBoost       | 74.796                  | 74.177           | 74.635        | 74.314          |
|                                          | Random Forest | 80.129                  | 79.797           | 80.100        | 79.887          |
| <i>DFT modulus, u</i>                    | AdaBoost      | 68.404                  | 68.759           | 68.307        | 68.512          |
|                                          | GBDT          | 71.131                  | 71.999           | 71.028        | 71.430          |
|                                          | LightGBM      | 84.263                  | 84.592           | 84.238        | 84.387          |
|                                          | HistGBDT      | 85.756                  | 85.901           | 85.775        | 85.831          |
|                                          | Decision Tree | 88.727                  | 88.694           | 88.702        | 88.696          |
|                                          | XGBoost       | 87.268                  | 87.404           | 87.202        | 87.295          |
|                                          | Random Forest | 92.826                  | 92.875           | 92.792        | 92.832          |
| <i>DFT modulus, u<sub>low-rank</sub></i> | AdaBoost      | 69.706                  | 69.000           | 69.706        | 69.275          |
|                                          | GBDT          | 73.476                  | 74.031           | 73.491        | 73.719          |
|                                          | LightGBM      | 85.756                  | 85.945           | 85.706        | 85.804          |
|                                          | HistGBDT      | 86.729                  | 86.886           | 86.714        | 86.788          |
|                                          | Decision Tree | 90.116                  | 90.099           | 90.172        | 90.125          |
|                                          | XGBoost       | 87.216                  | 87.363           | 87.168        | 87.247          |
|                                          | Random Forest | 92.322                  | 92.308           | 92.335        | 92.321          |
| <i>DFT modulus, u<sub>sparse</sub></i>   | AdaBoost      | 58.294                  | 58.898           | 57.719        | 58.047          |
|                                          | GBDT          | 60.570                  | 61.543           | 59.559        | 59.778          |
|                                          | LightGBM      | 82.439                  | 82.590           | 82.054        | 82.256          |
|                                          | HistGBDT      | 85.739                  | 85.821           | 85.417        | 85.580          |
|                                          | Decision Tree | 88.848                  | 88.786           | 88.763        | 88.770          |
|                                          | XGBoost       | 86.625                  | 86.784           | 86.360        | 86.526          |
|                                          | Random Forest | 93.556                  | 93.569           | 93.452        | 93.505          |
| <i>DFT modulus, p</i>                    | AdaBoost      | 69.394                  | 69.133           | 69.069        | 68.949          |
|                                          | GBDT          | 71.391                  | 71.743           | 71.143        | 71.370          |
|                                          | LightGBM      | 88.154                  | 88.173           | 88.078        | 88.117          |
|                                          | HistGBDT      | 82.039                  | 82.264           | 82.017        | 82.123          |
|                                          | Decision Tree | 91.489                  | 91.443           | 91.426        | 91.432          |
|                                          | XGBoost       | 86.729                  | 86.727           | 86.630        | 86.648          |
|                                          | Random Forest | 94.511                  | 94.499           | 94.442        | 94.476          |
| <i>DFT modulus, PPSW</i>                 | AdaBoost      | 68.629                  | 68.226           | 68.414        | 68.281          |
|                                          | GBDT          | 71.408                  | 71.578           | 71.174        | 71.331          |
|                                          | LightGBM      | 86.902                  | 87.052           | 86.812        | 86.918          |
|                                          | HistGBDT      | 88.571                  | 88.605           | 88.516        | 88.557          |
|                                          | Decision Tree | 90.846                  | 90.775           | 90.821        | 90.797          |
|                                          | XGBoost       | 88.917                  | 89.042           | 88.839        | 88.932          |
|                                          | Random Forest | 94.754                  | 94.744           | 94.729        | 94.734          |

**Table S4.** Performance metrics of various state-of-the-art tree-based machine learning models for classifying cell media environment spectra within the Gradient Density dataset.

| <i>Variables</i>                              | <i>Model</i>  | <i>Percentage Split</i> |                  |               |                 |
|-----------------------------------------------|---------------|-------------------------|------------------|---------------|-----------------|
|                                               |               | <i>Accuracy</i>         | <i>Precision</i> | <i>Recall</i> | <i>F1-score</i> |
| <i>Original, u</i><br><b>Baseline</b>         | AdaBoost      | 55.324                  | 56.199           | 55.488        | 55.390          |
|                                               | GBDT          | 57.634                  | 57.732           | 57.564        | 57.570          |
|                                               | LightGBM      | 69.654                  | 69.700           | 69.712        | 69.609          |
|                                               | HistGBDT      | 70.019                  | 70.034           | 70.083        | 69.971          |
|                                               | Decision Tree | 71.947                  | 71.777           | 71.782        | 71.767          |
|                                               | XGBoost       | 72.295                  | 72.204           | 72.210        | 72.217          |
|                                               | Random Forest | 80.146                  | 80.041           | 80.085        | 80.058          |
| <i>DFT modulus, u</i>                         | AdaBoost      | 50.860                  | 50.706           | 50.986        | 50.749          |
|                                               | GBDT          | 53.135                  | 53.155           | 52.986        | 52.882          |
|                                               | LightGBM      | 75.682                  | 75.084           | 75.489        | 75.611          |
|                                               | HistGBDT      | 78.079                  | 78.121           | 78.030        | 78.053          |
|                                               | Decision Tree | 85.861                  | 85.863           | 85.874        | 85.868          |
|                                               | XGBoost       | 80.684                  | 80.727           | 80.625        | 80.649          |
|                                               | Random Forest | 90.290                  | 90.318           | 90.294        | 90.306          |
| <i>DFT modulus, <math>u_{low-rank}</math></i> | AdaBoost      | 48.602                  | 48.223           | 48.642        | 47.897          |
|                                               | GBDT          | 51.711                  | 51.521           | 51.651        | 50.935          |
|                                               | LightGBM      | 75.022                  | 75.817           | 74.865        | 74.920          |
|                                               | HistGBDT      | 77.870                  | 78.020           | 77.808        | 77.874          |
|                                               | Decision Tree | 83.933                  | 83.926           | 83.858        | 83.889          |
|                                               | XGBoost       | 78.426                  | 78.555           | 78.320        | 78.402          |
|                                               | Random Forest | 89.196                  | 89.219           | 89.153        | 89.182          |
| <i>DFT modulus, <math>u_{sparse}</math></i>   | AdaBoost      | 59.823                  | 58.626           | 58.444        | 56.658          |
|                                               | GBDT          | 61.560                  | 60.763           | 60.263        | 59.363          |
|                                               | LightGBM      | 80.928                  | 81.618           | 80.255        | 80.382          |
|                                               | HistGBDT      | 83.307                  | 83.603           | 82.834        | 82.962          |
|                                               | Decision Tree | 89.387                  | 89.344           | 89.355        | 89.312          |
|                                               | XGBoost       | 85.948                  | 86.306           | 85.532        | 85.721          |
|                                               | Random Forest | 93.677                  | 93.705           | 93.564        | 93.625          |
| <i>DFT modulus, p</i>                         | AdaBoost      | 65.086                  | 62.103           | 64.073        | 54.660          |
|                                               | GBDT          | 84.523                  | 85.157           | 85.199        | 85.021          |
|                                               | LightGBM      | 89.682                  | 90.008           | 90.092        | 90.011          |
|                                               | HistGBDT      | 89.977                  | 90.290           | 90.375        | 90.295          |
|                                               | Decision Tree | 90.099                  | 90.386           | 90.377        | 90.381          |
|                                               | XGBoost       | 90.603                  | 90.886           | 90.976        | 90.898          |
|                                               | Random Forest | 93.260                  | 93.440           | 93.518        | 93.466          |
| <i>DFT modulus, PPSW</i>                      | AdaBoost      | 50.009                  | 49.914           | 49.998        | 49.927          |
|                                               | GBDT          | 53.483                  | 53.458           | 53.409        | 53.354          |
|                                               | LightGBM      | 77.506                  | 77.666           | 77.307        | 77.398          |
|                                               | HistGBDT      | 80.372                  | 80.498           | 80.241        | 80.329          |
|                                               | Decision Tree | 86.434                  | 86.394           | 86.468        | 86.425          |
|                                               | XGBoost       | 81.414                  | 81.468           | 81.276        | 81.351          |
|                                               | Random Forest | 91.437                  | 91.403           | 91.436        | 91.419          |
